# Supplementary material for: Non-swelling hydrogel-based microfluidic chips
Source: Royal Society of Chemistry journal article supplement (doi:10.1039/c9lc00564a), 2019-01-01
Supplement: c9lc00564a2.pdf [file c9lc00564a2.pdf]

# **Non-swelling Hydrogel-based Microfluidic Chips**

Chong Shen, Yingjun Li, Ying Wang, Qin Meng\*

# Figure S1

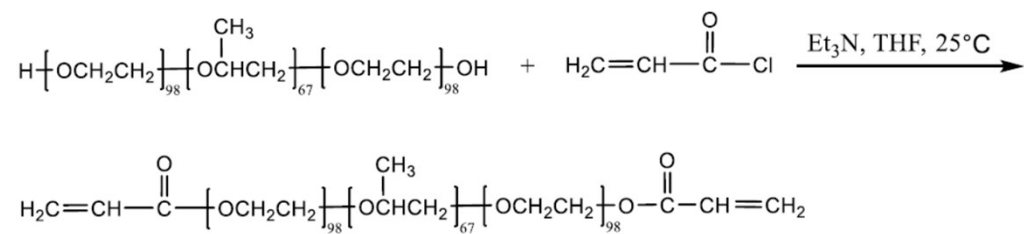

Figure S1 Synthesis procedure for di-acrylated F127.

## Figure S2

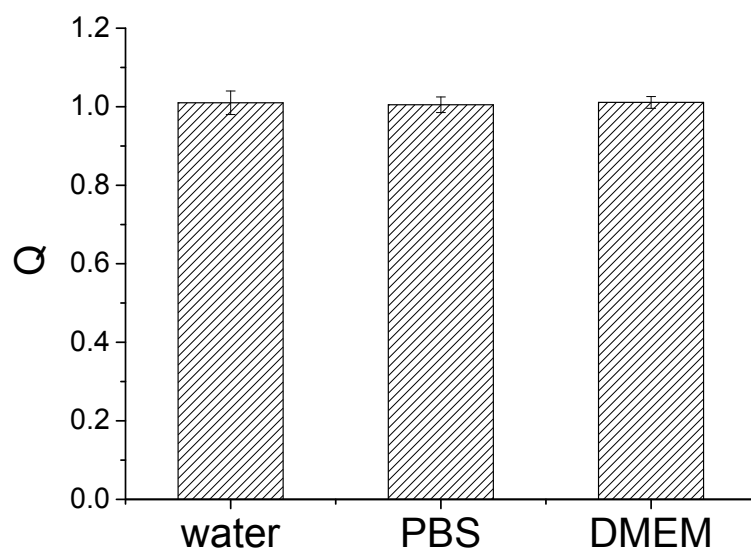

Figure S2 Swelling factors of F127-DA hydrogel (10 wt%) in water, PBS and DMEM medium at 37°C.

## Figure S3

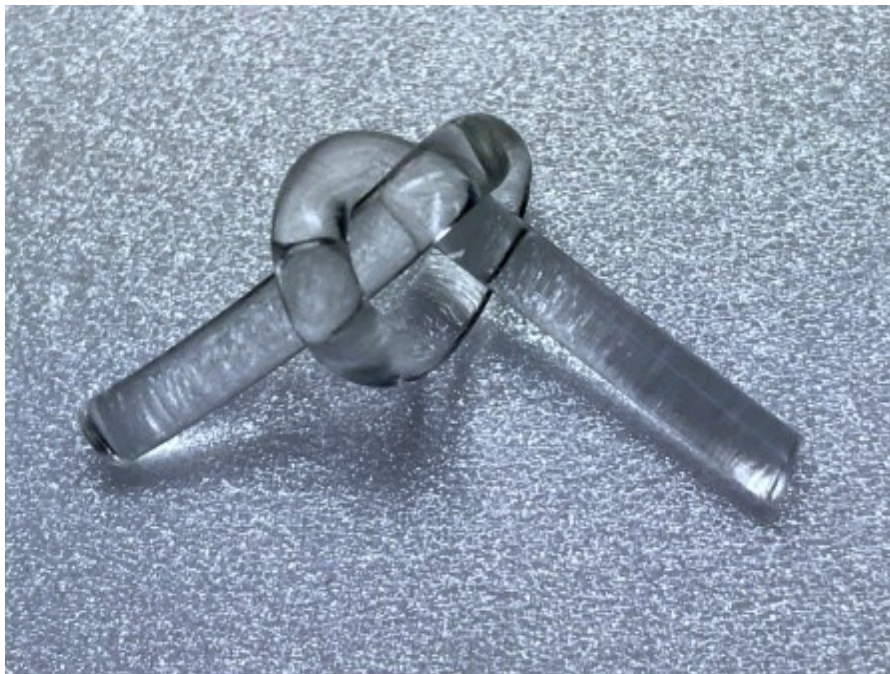

Figure S3 F127-DA hydrogel at twisted shape.

## Figure S4

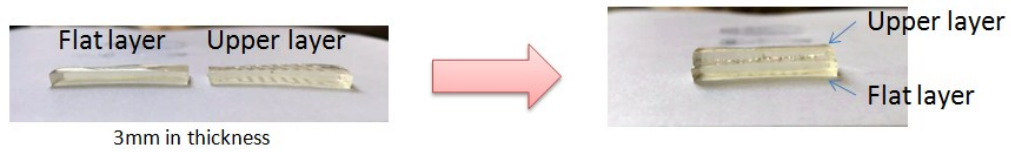

Figure S4 Assembly of hydrogel microfluidic by flat layer and upper layer.

**Figure S5**

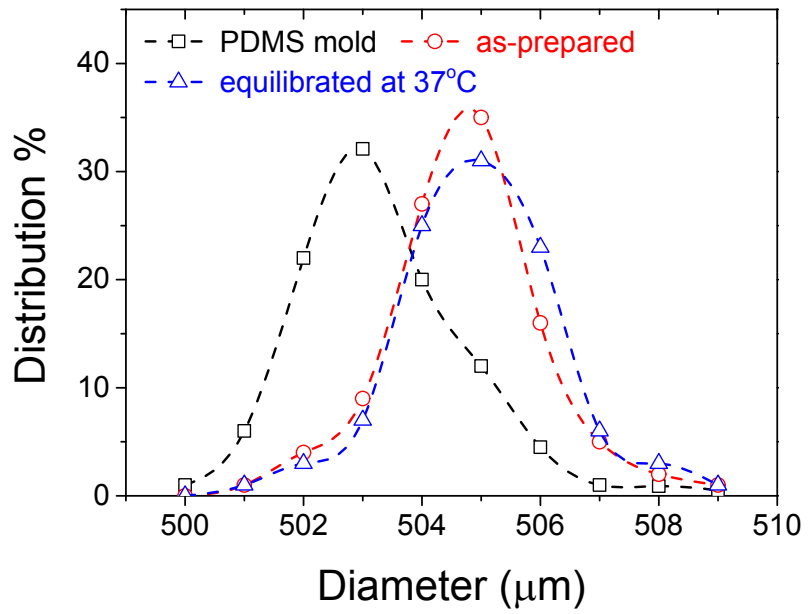

Figure S5 Distribution of channel diameters of PDMS mold and hydrogel chips.

## Figure S6

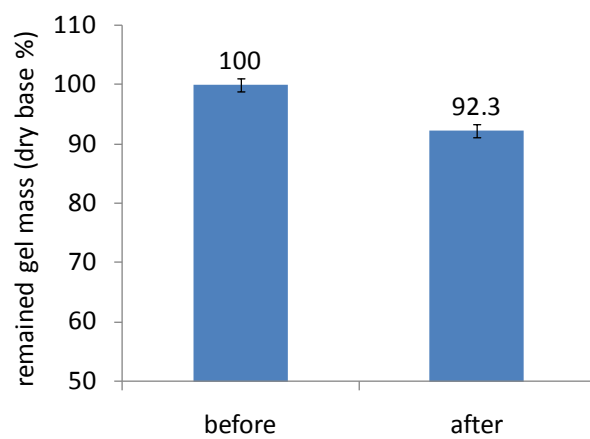

Figure S6 Degradation of hydrogel after autoclaving.

**Figure S7**

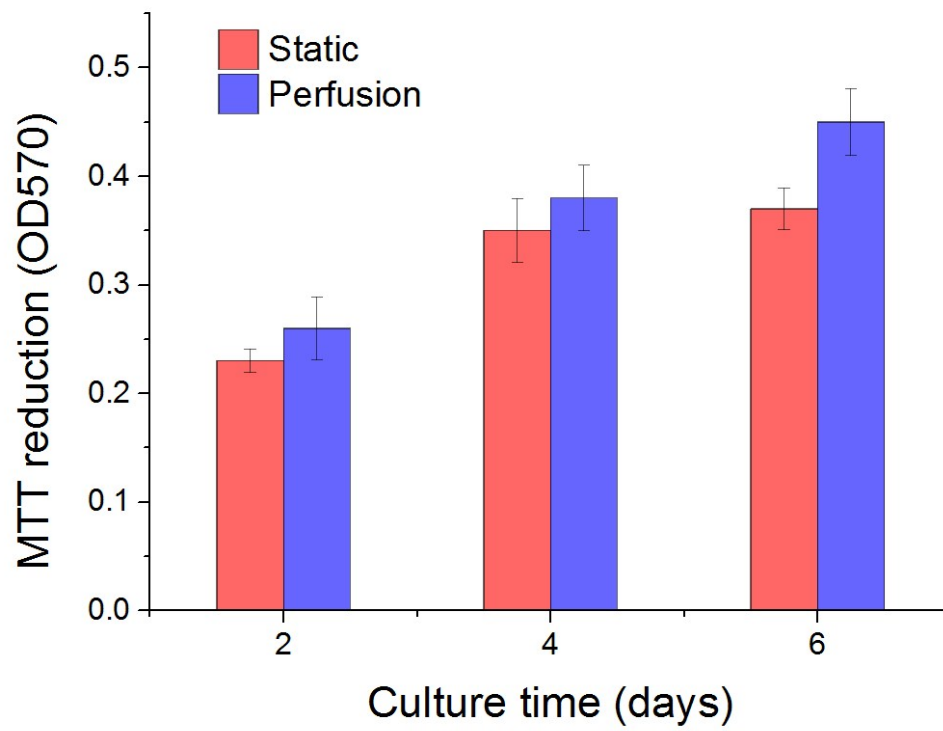

Figure S7 MTT reduction of HUVECs on vessel-on-a-chip at static and perfusion culture.
